# Supplementary material
Source: MDPI journal article supplement (https://www.mdpi.com/2079-6412/11/4/396)
Supplement: s1 [file s1]

# Supplementary Materials: Effect of Edible Carboxymethyl Chitosan-Gelatin Based Coating on the Quality and Nutritional Properties of Different Sweet Cherry Cultivars during Postharvest Storage

Yu-Lei Zhang <sup>1</sup>, Qing-Liang Cui <sup>1,\*</sup>, Yu Wang <sup>2</sup>, Fei Shi <sup>2</sup>, Hua Fan <sup>3</sup>, Yan-Qing Zhang <sup>1</sup>, Si-Tong Lai <sup>1</sup>, Ze-Hui Li <sup>1</sup>, Lang Li <sup>1</sup> and Yi-Ke Sun <sup>1</sup>

- <sup>1</sup> College of Agricultural Engineering, Shanxi Agricultural University, Taigu 030801, China; zyl0101@stu.sxau.edu.cn (Y.-L.Z.); yqzhang@sxau.edu.cn (Y.-Q.Z.); lsitong951116@stu.sxau.edu.cn (S.-T.L.); Z20193273@stu.sxau.edu.cn (Z.-H.L.); langli@stu.sxau.edu.cn (L.L.); yikesun@stu.sxau.edu.cn (Y.-K.S.)
- <sup>2</sup> College of Food Science and Engineering, Shanxi Agricultural University, Taigu 030801, China; wangyu@sxau.edu.cn (Y.W.); shifei@sxau.edu.cn (F.S.)
- <sup>3</sup> Experimental Teaching Center, Shanxi Agricultural University, Taigu 030801, China; fanhua@sxau.edu.cn
- \* Correspondence: qlcui@sxau.edu.cn; Tel.: +86-0354-6288906

**Citation:** Zhang, Y.-L.; Cui, Q.-L.; Wang, Y.; Shi, F.; Fan, H.; Zhang, Y.-Q.; Lai, S.-T.; Li, Z.-H.; Li, L.; Sun, Y.-K. Effect of Edible Carboxymethyl Chitosan-Gelatin Based Coating on the Quality and Nutritional Properties of Different Sweet Cherry Cultivars during Postharvest Storage. *Coatings* **2021**, *11*, 396. <https://doi.org/10.3390/coatings11040396>

Academic Editor: Gianni Zoccatelli

Received: 8 March 2021

Accepted: 26 March 2021

Published: 30 March 2021

**Publisher's Note:** MDPI stays neutral with regard to jurisdictional claims in published maps and institutional affiliations.

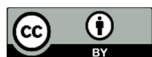

**Copyright:** © 2021 by the authors. Licensee MDPI, Basel, Switzerland. This article is an open access article distributed under the terms and conditions of the Creative Commons Attribution (CC BY) license (<http://creativecommons.org/licenses/by/4.0/>).

## Supplement 1. The pictures of four cultivars of sweet cherry at harvest.

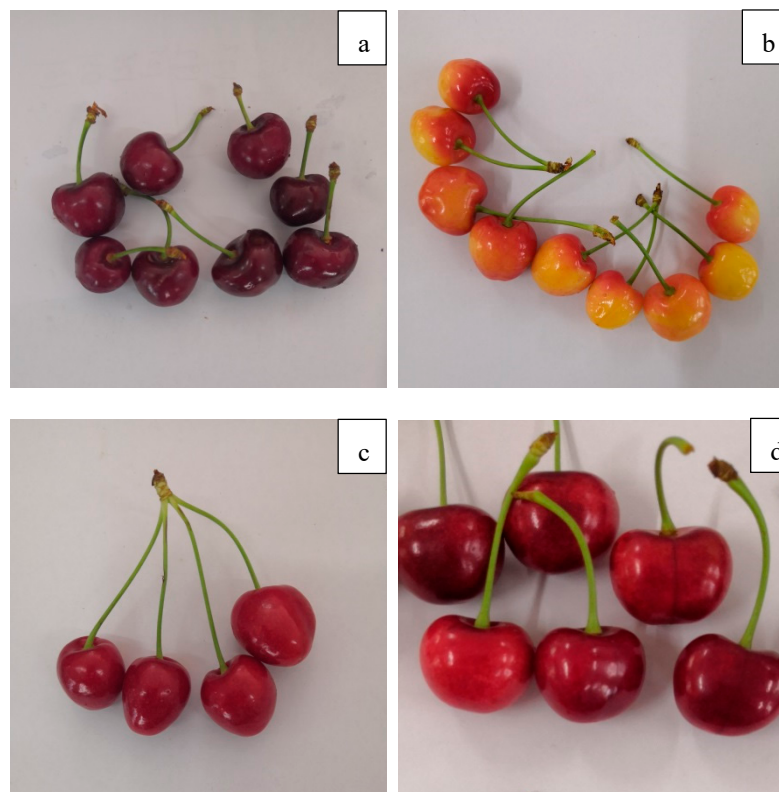

**Figure S1.** The pictures of (a) Red Light, (b) Ranier, (c) Red Agate, and (d) Friendship at harvest.

**Supplement 2. Standard curve for the determination of TPC**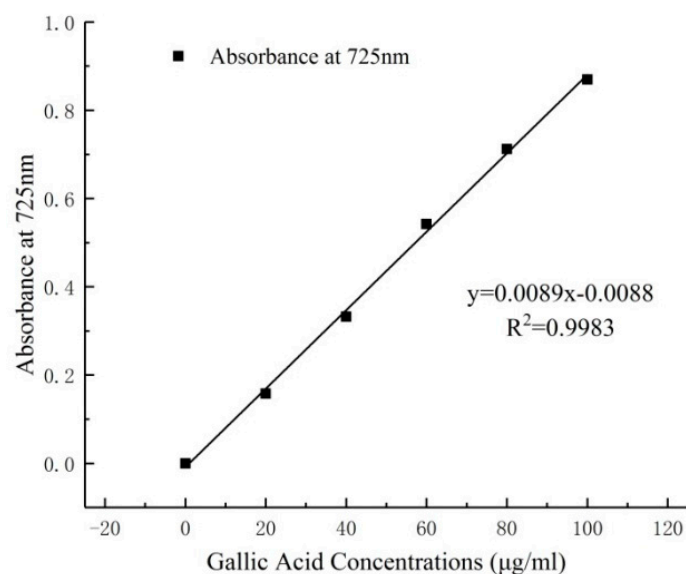**Figure S2.** Standard curve for the determination of TPC.**Supplement 3. Standard curve for the determination of DPPH RSC**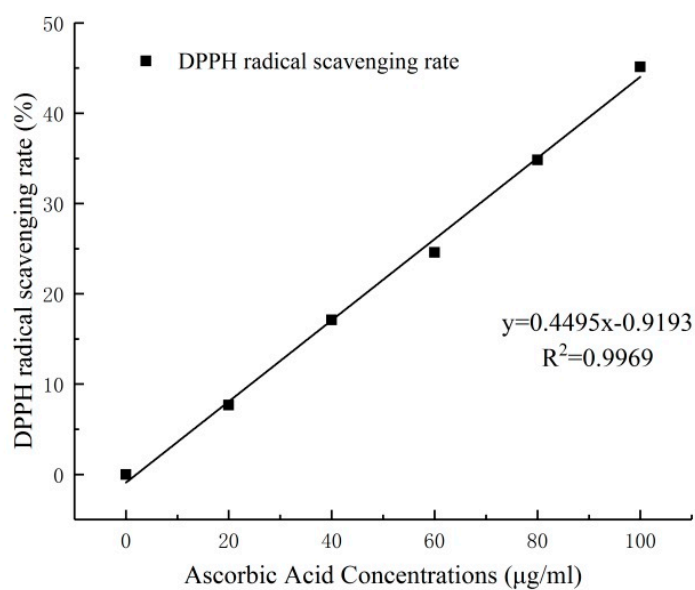**Figure S3.** Standard curve for the determination of DPPH RSC.
